# Supplementary material for: Association of Dietary Fiber Intake with All-Cause Mortality and Cardiovascular Disease Mortality: A 10-Year Prospective Cohort Study
Source: MDPI journal article supplement (doi:10.3390/nu14153089), 2022-07-27
Supplement: s1 [file s1]

**Supplementary Table S1. Multiple Cox proportional hazard regression analysis for all-cause mortality and cardiovascular disease (CVD) mortality of fiber intake quintiles according to the presence of hypertension, diabetes and dyslipidemia**

| <b>Hypertension</b>        | <b>Q1</b>    | <b>Q2</b>    | <b>Q3</b>    | <b>Q4</b>    | <b>Q5</b>    |
|----------------------------|--------------|--------------|--------------|--------------|--------------|
|                            | (0.42, 3.48) | (3.48, 4.62) | (4.62, 5.77) | (5.77, 7.45) | (7.45, 41.7) |
| Hazard ratios              |              |              |              |              |              |
| (95% Confidence intervals) |              |              |              |              |              |
| All-cause mortality        |              |              |              |              |              |
| Unadjusted                 | 1.00 (ref)   | 0.79         | 0.67         | 0.62         | 0.55         |
|                            |              | (0.68, 0.91) | (0.58, 0.79) | (0.53, 0.73) | (0.47, 0.65) |
| Model 1                    | 1.00 (ref)   | 0.85         | 0.78         | 0.76         | 0.72         |
|                            |              | (0.73, 0.99) | (0.67, 0.92) | (0.65, 0.89) | (0.61, 0.85) |
| Model 2                    | 1.00 (ref)   | 0.87         | 0.82         | 0.80         | 0.77         |
|                            |              | (0.75, 1.02) | (0.69, 0.97) | (0.67, 0.95) | (0.63, 0.94) |
| Model 3*                   | 1.00 (ref)   | 0.88         | 0.84         | 0.82         | 0.79         |
|                            |              | (0.75, 1.03) | (0.70, 0.99) | (0.68, 1.00) | (0.61, 1.03) |
| CVD mortality              |              |              |              |              |              |
| Unadjusted                 | 1.00 (ref)   | 0.80         | 0.57         | 0.59         | 0.55         |
|                            |              | (0.59, 1.09) | (0.41, 0.80) | (0.43, 0.83) | (0.39, 0.77) |
| Model 1                    | 1.00 (ref)   | 0.91         | 0.71         | 0.79         | 0.79         |
|                            |              | (0.66, 1.23) | (0.51, 1.01) | (0.56, 1.10) | (0.56, 1.11) |
| Model 2                    | 1.00 (ref)   | 0.90         | 0.70         | 0.75         | 0.72         |
|                            |              | (0.66, 1.23) | (0.49, 1.00) | (0.52, 1.09) | (0.47, 1.09) |
| Model 3*                   | 1.00 (ref)   | 0.92         | 0.73         | 0.81         | 0.80         |
|                            |              | (0.67, 1.27) | (0.51, 1.06) | (0.54, 1.21) | (0.47, 1.36) |

| <b>Diabetes</b>            | Q1           | Q2           | Q3           | Q4           | Q5            |
|----------------------------|--------------|--------------|--------------|--------------|---------------|
|                            | (0.59, 3.45) | (3.45, 4.53) | (4.53, 5.66) | (5.66, 7.32) | (7.32, 40.9)  |
| Hazard ratios              |              |              |              |              |               |
| (95% Confidence intervals) |              |              |              |              |               |
| All-cause mortality        |              |              |              |              |               |
| Unadjusted                 | 1.00 (ref)   | 0.78         | 0.69         | 0.70         | 0.53          |
|                            |              | (0.64, 0.96) | (0.56, 0.85) | (0.57, 0.85) | (0.43, 0.66)  |
| Model 1                    | 1.00 (ref)   | 0.81         | 0.75         | 0.79         | 0.64          |
|                            |              | (0.66, 0.99) | (0.61, 0.92) | (0.64, 0.97) | (0.51, 0.80)  |
| Model 2                    | 1.00 (ref)   | 0.84         | 0.83         | 0.90         | 0.77          |
|                            |              | (0.69, 1.03) | (0.67, 1.03) | (0.72, 1.12) | (0.59, 1.00)  |
| Model 3†                   | 1.00 (ref)   | 0.84         | 0.82         | 0.90         | 0.76          |
|                            |              | (0.68, 1.04) | (0.66, 1.03) | (0.70, 1.15) | (0.55, 1.07)  |
| CVD                        |              |              |              |              |               |
| mortality                  |              |              |              |              |               |
| Unadjusted                 | 1.00 (ref)   | 0.73         | 0.59         | 0.78         | 0.33          |
|                            |              | (0.46, 1.15) | (0.36, 0.96) | (0.50, 1.21) | (0.19, 0.59)  |
| Model 1                    | 1.00 (ref)   | 0.77         | 0.65         | 0.91         | 0.42          |
|                            |              | (0.49, 1.21) | (0.40, 1.06) | (0.58, 1.43) | (0.24, 0.74)  |
| Model 2                    | 1.00 (ref)   | 0.78         | 0.67         | 0.95         | 0.44          |
|                            |              | (0.49, 1.24) | (0.40, 1.11) | (0.58, 1.57) | (0.22, 0.87)  |
| Model 3†                   | 1.00 (ref)   | 0.75         | 0.62         | 0.84         | 0.33          |
|                            |              | (0.47, 1.20) | (0.36, 1.04) | (0.49, 1.45) | (0.14, 0.75)  |
| <b>Dyslipidemia</b>        | Q1           | Q2           | Q3           | Q4           | Q5            |
|                            | (0.37, 3.51) | (3.51, 4.64) | (4.64, 5.79) | (5.79, 7.44) | (7.44, 52.65) |

| Hazard ratios                                                                                                          |            |              |              |              |              |
|------------------------------------------------------------------------------------------------------------------------|------------|--------------|--------------|--------------|--------------|
| (95% Confidence intervals)                                                                                             |            |              |              |              |              |
| All-cause mortality                                                                                                    |            |              |              |              |              |
| Unadjusted                                                                                                             | 1.00 (ref) | 0.71         | 0.62         | 0.56         | 0.50         |
|                                                                                                                        |            | (0.64, 0.79) | (0.56, 0.69) | (0.50, 0.63) | (0.49, 0.56) |
| Model 1                                                                                                                | 1.00 (ref) | 0.80         | 0.71         | 0.69         | 0.67         |
|                                                                                                                        |            | (0.72, 0.88) | (0.64, 0.79) | (0.62, 0.77) | (0.60, 0.75) |
| Model 2                                                                                                                | 1.00 (ref) | 0.83         | 0.76         | 0.75         | 0.74         |
|                                                                                                                        |            | (0.75, 0.92) | (0.68, 0.85) | (0.66, 0.85) | (0.65, 0.86) |
| Model 3†                                                                                                               | 1.00 (ref) | 0.84         | 0.78         | 0.78         | 0.79         |
|                                                                                                                        |            | (0.75, 0.93) | (0.69, 0.87) | (0.68, 0.89) | (0.67, 0.95) |
| CVD                                                                                                                    |            |              |              |              |              |
| mortality                                                                                                              |            |              |              |              |              |
| Unadjusted                                                                                                             | 1.00 (ref) | 0.67         | 0.41         | 0.49         | 0.35         |
|                                                                                                                        |            | (0.54, 0.84) | (0.32, 0.53) | (0.39, 0.62) | (0.27, 0.45) |
| Model 1                                                                                                                | 1.00 (ref) | 0.79         | 0.51         | 0.66         | 0.51         |
|                                                                                                                        |            | (0.64, 0.99) | (0.40, 0.66) | (0.52, 0.84) | (0.39, 0.67) |
| Model 2                                                                                                                | 1.00 (ref) | 0.82         | 0.53         | 0.69         | 0.53         |
|                                                                                                                        |            | (0.66, 1.03) | (0.41, 0.70) | (0.53, 0.91) | (0.38, 0.73) |
| Model 3†                                                                                                               | 1.00 (ref) | 0.83         | 0.56         | 0.73         | 0.57         |
|                                                                                                                        |            | (0.66, 1.04) | (0.42, 0.74) | (0.54, 0.99) | (0.38, 0.87) |
| Model 1: adjusted for age, sex, and body mass index (BMI)                                                              |            |              |              |              |              |
| Model 2: adjusted for age, sex, BMI, smoking, alcohol intake, exercise, and total calorie                              |            |              |              |              |              |
| Model 3*: adjusted for age, sex, BMI, smoking, alcohol intake, exercise, total calorie, diabetes, and dyslipidemia     |            |              |              |              |              |
| Model 3†: adjusted for age, sex, BMI, smoking, alcohol intake, exercise, total calorie, hypertension, and dyslipidemia |            |              |              |              |              |
| Model 3‡: adjusted for age, sex, BMI, smoking, alcohol intake, exercise, total calorie, hypertension, and diabetes     |            |              |              |              |              |
